# Supplementary material for: RUNX1B Expression Is Highly Heterogeneous and Distinguishes Megakaryocytic and Erythroid Lineage Fate in Adult Mouse Hematopoiesis
Source: PubMed Central journal article supplement (PMC4726605; doi:10.1371/journal.pgen.1005814), 2016-01-25
Supplement: pgen.1005814.s003.pdf [file pgen.1005814.s003.pdf]

**A**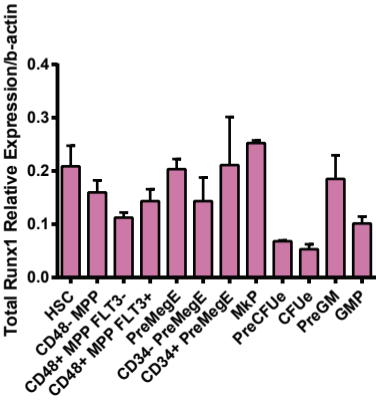**B**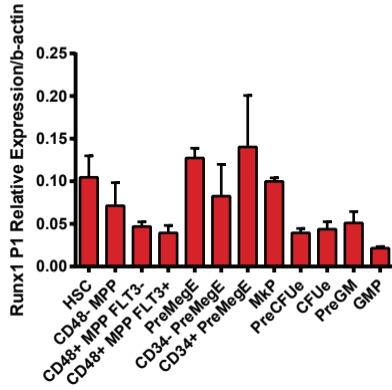**C**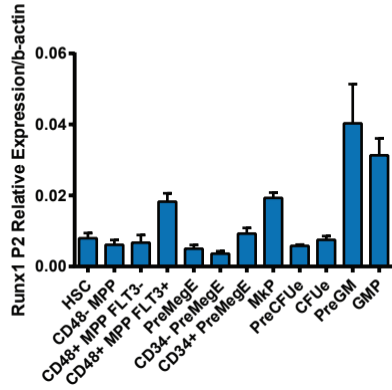**S3 Fig.**
