# Supplementary material for: RUNX1B Expression Is Highly Heterogeneous and Distinguishes Megakaryocytic and Erythroid Lineage Fate in Adult Mouse Hematopoiesis
Source: PubMed Central journal article supplement (PMC4726605; doi:10.1371/journal.pgen.1005814), 2016-01-25
Supplement: pgen.1005814.s006.pdf [file pgen.1005814.s006.pdf]

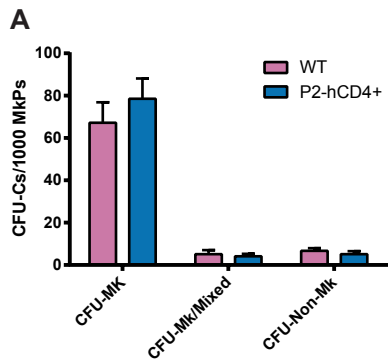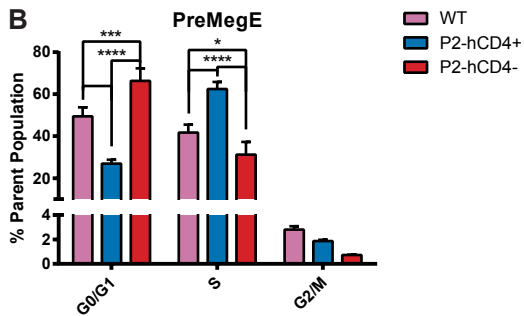

**C**

| <i>P1-GFP::P2-hCD4/+</i> PreMegE | No. cells per well | No. positive wells | % Mk only | % Ery only | % Mk + Ery |
|----------------------------------|--------------------|--------------------|-----------|------------|------------|
| <i>P1+ P2+</i>                   | 1                  | 117/480 (24%)      | 31.4      | 25.7       | 42.9       |
| <i>P1+ P2-</i>                   | 1                  | 133/480 (28%)      | 12.5      | 62.5       | 25         |
